# Supplementary material for: Deubiquitinase USP7 regulates <italic>Drosophila</italic> aging through ubiquitination and autophagy
Source: publisher site journal article supplement (doi:10.18632/aging.104067), 2020-11-20
Supplement: Supplementary file [file aging-v12i22-104067-supplementary-material-SD1.pdf]

## SUPPLEMENTARY FIGURE

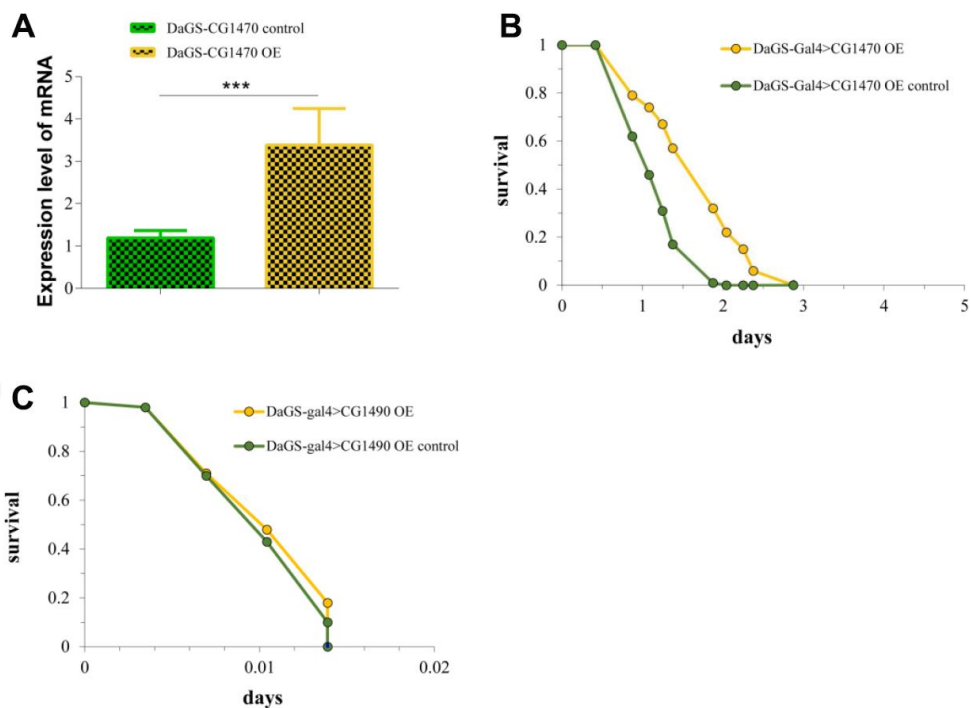

**Supplementary Figure 1. Effect of *dusp7* overexpression on *Drosophila* stress tolerance. (A)** Expression level of *dusp7* mRNA in *dusp7* overexpression flies (\*\* $p < 0.001$ ). (B) Effect of *dusp7* overexpression on *Drosophila* tolerance to paraquat. (C) Effect of *dusp7* overexpression on *Drosophila* tolerance to heat stimulation.
